# Supplementary material for: Molecular Characterization and Expression Patterns of the HkSVP Gene Reveal Distinct Roles in Inflorescence Structure and Floral Organ Development in Hemerocallis fulva
Source: MDPI journal article supplement (doi:10.3390/ijms222112010), 2021-11-05
Supplement: s1 [file s1]

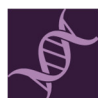

## Supplementary Materials:

**Table S1.** Primers used in this study. Tables should be placed in the main text near to the first time they are cited.

| Primer name       | Sequence (5'→3')                                   |
|-------------------|----------------------------------------------------|
| <i>HkSVP-F</i>    | ATGGTAAGGGAGAAGATACA                               |
| <i>HkSVP-R</i>    | TCACTTCCATGGCAACCCTA                               |
| <i>HkSVP-QF</i>   | TCTCTGGCACTGGCAAACCTT                              |
| <i>HkSVP-QR</i>   | GTCAAGAGATAGTTGTTCTC                               |
| <i>HkSVP-SF</i>   | TCTAGAATGGTAAGGGAGAAGATACA                         |
| <i>HkSVP-SR</i>   | GGATCCCTTCCATGGCAACCCTAAC                          |
| <i>HkSVP-OE-F</i> | GGATCCATGGTAAGGGAGAAGATACA                         |
| <i>HkSVP-OE-R</i> | GGTACCTCACTTCCATGGCAACCCTA                         |
| <i>Actin-F</i>    | CTCAGTGGTGGGTCTACTAT                               |
| <i>Actin-R</i>    | GAGGAGCAACCACCTTAATC                               |
| <i>AP1-YF</i>     | ACAACTTTGTACAAAAAAGTTGGATGGGGAGAG-<br>GAAAAGTG     |
| <i>AP1-YR</i>     | ACAACTTTGTACAAGAAAGTTGGGTACTTAC-<br>CATTCAAATG     |
| <i>TFL1-YF</i>    | ACAACTTTGTACAAAAAAGTTGGATGGCAAGAG-<br>CAGTACAGCC   |
| <i>TFL1-YR</i>    | ACAACTTTGTACAAGAAAGTT-<br>GGGTAGCGCCTTCGCGCTGCAG   |
| <i>SVP-YF</i>     | ACAACTTTGTACAAAAAAGTTGGATGG-<br>TAAGGGAGAAGATACAG  |
| <i>SVP-YR</i>     | ACAACTTTGTACAAGAAAGTT-<br>GGGTACTTCCATGGCAACCCTAAC |
| <i>AtFT-F</i>     | GGTGTTCAGTTGTAGCAGG                                |
| <i>AtFT-R</i>     | GGTGGAGAAGACCTCAGGAAC                              |
| <i>AtTFL1-F</i>   | TGGATCGTTACAAACATTCCCG                             |
| <i>AtTFL1-R</i>   | GTCTTTGCTTCTGCCTGAAC                               |
| <i>AtSOC1-F</i>   | GTGTCAAATGTATTTCGAGCAAG                            |
| <i>AtSOC1-R</i>   | GAAGAACAAGGTAACCCAATGA                             |
| <i>AtAP1-F</i>    | CTGTGATGCTGAAGTTGCTC                               |
| <i>AtAP1-R</i>    | TGTATTGACGTCGGACTCAG                               |
| <i>AtUBQ-F</i>    | AGGACAAAGAGGGTATCCCA                               |
| <i>AtUBQ-R</i>    | CAGACGCAAGACCAAGTGAA                               |

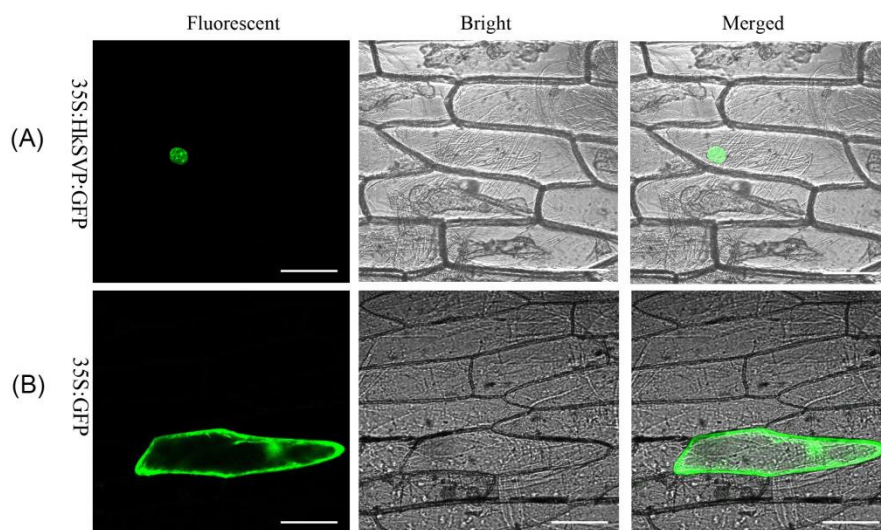

**Figure S1.** Subcellular localization of HkSVP in onion epidermal cell. A is HkSVP fused GFP at C terminal, B is GFP alone, which were both driven by the CaMV 35S promoter and introduced into onion epidermal cells by biolistic transformation. The transformed samples were maintained at 25°C for 24 h to observe fluorescent using the confocal microscope. Scale bars, 100  $\mu$ m.

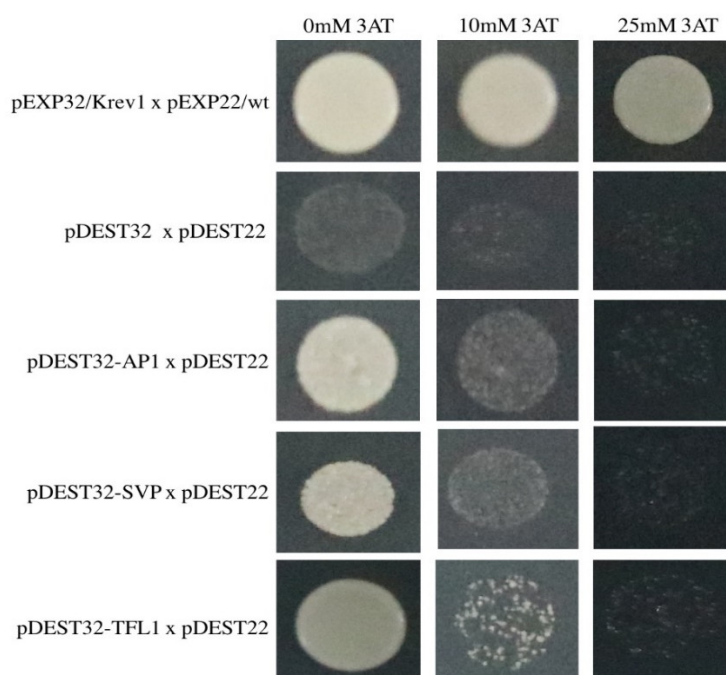

**Figure S2.** Detection of bait plasmid self-activation. 0 mM, 10 mM and 25 mM 3AT were added to the triple drop out (SC/-Leu/-Trp/-his) medium respectively to observe the growth of bait plasmid and control. All co-transformed combinations could grow at a lower 3AT concentration. When the 3AT concentration was 25 mM, the growth of bait plasmid was completely inhibited. Therefore, 25 mM 3AT was used as the screening concentration to inhibit the growth of false-positive yeast transformants.
